# Supplementary material for: Multi-scale modeling study of the source contributions to near-surface ozone and sulfur oxides levels over California during the ARCTAS-CARB period
Source: Copernicus journal article supplement (doi:10.5194/acp-11-3173-2011), 2011-04-04
Supplement: Supplementary file 1 [file acp-11-3173-2011-supplement.pdf]

## Supplement

Descriptions of six CARB sites over SC ([http://www.arb.ca.gov/qaweb/sitelist\\_create.php](http://www.arb.ca.gov/qaweb/sitelist_create.php))

| ARB Site Number | AIRS Site Number | Site Name                     | County         | Basin       | Agency           | Latitude (°N) | Longitude (°W) |
|-----------------|------------------|-------------------------------|----------------|-------------|------------------|---------------|----------------|
| 30195           | 060591003        | Costa Mesa-Mesa Verde Drive   | Orange         | South Coast | South Coast AQMD | 33.67389      | -117.926       |
| 33144           | 060658001        | Rubidoux - Mission Blvd       | Riverside      | South Coast | South Coast AQMD | 34.00056      | -117.415       |
| 36197           | 060712002        | Fontana-Arrow Highway         | San Bernardino | South Coast | South Coast AQMD | 34.10028      | -117.492       |
| 70069           | 060371002        | Burbank                       | Los Angeles    | South Coast | South Coast AQMD | 34.17583      | -118.317       |
| 70072           | 060374002        | North Long Beach (Long Beach) | Los Angeles    | South Coast | South Coast AQMD | 33.82361      | -118.189       |
| 70087           | 060371103        | Los Angeles-North Main Street | Los Angeles    | South Coast | South Coast AQMD | 34.06639      | -118.227       |
